# Supplementary material for: Rapid Encoding of New Memories by Individual Neurons in the Human Brain
Source: PubMed Central journal article supplement (PMC4509714; doi:10.1016/j.neuron.2015.06.016), 2015-07-01
Supplement: mmc3.pdf [file mmc3.pdf]

# Neuron

## Rapid Encoding of New Memories by Individual Neurons in the Human Brain

### Highlights

- Contextual associations were used to model the formation of new memories
- Human single neurons changed their firing patterns to encode new associations
- Changes occurred at the exact moment of learning, even after single presentations
- The rapid speed of neural changes is compatible with episodic memory formation

### Authors

Matias J. Ison, Rodrigo Quian Quiroga, Itzhak Fried

### Correspondence

mji3@le.ac.uk

### In Brief

Ison et al. recorded from single neurons in the human brain while patients learned contextual associations. They found that neurons change their firing to incept new associations even after one single presentation, thus providing a plausible mechanism underlying memory formation.

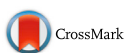

# Rapid Encoding of New Memories by Individual Neurons in the Human Brain

Matias J. Ison,<sup>1,2,\*</sup> Rodrigo Quian Quiroga,<sup>1,2,5</sup> and Itzhak Fried<sup>3,4,5</sup>

<sup>1</sup>Centre for Systems Neuroscience, University of Leicester, Leicester, LE1 7QR, UK

<sup>2</sup>Department of Engineering, University of Leicester, Leicester, LE1 7RH, UK

<sup>3</sup>Department of Neurosurgery, David Geffen School of Medicine and Semel Institute for Neuroscience and Human Behavior, University of California Los Angeles, Los Angeles, CA 90095-7039, USA

<sup>4</sup>Functional Neurosurgery Unit, Tel-Aviv Medical Center and Sackler Faculty of Medicine, Tel-Aviv University, Tel-Aviv, 69978, Israel

<sup>5</sup>Co-senior author

\*Correspondence: [mji3@le.ac.uk](mailto:mji3@le.ac.uk)

<http://dx.doi.org/10.1016/j.neuron.2015.06.016>

This is an open access article under the CC BY license (<http://creativecommons.org/licenses/by/4.0/>).

## SUMMARY

The creation of memories about real-life episodes requires rapid neuronal changes that may appear after a single occurrence of an event. How is such demand met by neurons in the medial temporal lobe (MTL), which plays a fundamental role in episodic memory formation? We recorded the activity of MTL neurons in neurosurgical patients while they learned new associations. Pairs of unrelated pictures, one of a person and another of a place, were used to construct a meaningful association modeling the episodic memory of meeting a person in a particular place. We found that a large proportion of responsive MTL neurons expanded their selectivity to encode these specific associations within a few trials: cells initially responsive to one picture started firing to the associated one but not to others. Our results provide a plausible neural substrate for the inception of associations, which are crucial for the formation of episodic memories.

## INTRODUCTION

Neuroimaging investigations in humans and behavioral studies of neurological patients have substantiated the importance of the medial temporal lobe (MTL) for episodic memories (Davachi, 2006; Eichenbaum, 2004; Eichenbaum et al., 2007; Moscovitch, 1994; Squire et al., 2004; Tulving, 2002). Furthermore, neurophysiological and lesion studies in animals have shown that the MTL is involved in the encoding of associations (Bunsey and Eichenbaum, 1996; Day et al., 2003; Kahana et al., 2008; Sakai and Miyashita, 1991; Wirth et al., 2003), which is a key mechanism for episodic memory formation. In spite of the major significance of these works in advancing our understanding of episodic memory, their contribution has been limited. On the one hand, human studies have not addressed episodic memory formation at the single neuron level. Animal studies, on the other hand, have relied on extensive reward-driven training with numerous repetitions of non-natural stimuli, thus offering a

limited account on how single exposures to natural stimuli can give rise to the rapid encoding of new episodic memories.

Neurons in the human MTL have been found to respond to concepts that are related to each other (Quian Quiroga, 2012; Quian Quiroga et al., 2005), such as two co-stars in the same television series or a few researchers (previously unknown to the patients) involved in the experiments (Quian Quiroga et al., 2009; Viskontas et al., 2009). Here we designed a paradigm to study how fast these associations can be created and whether this speed is compatible with basic mechanisms of episodic memory creation. We postulate that associations can be formed by partially overlapping cell assemblies encoding related concepts (Quian Quiroga, 2012) and show experimental evidence of rapid changes of single-cell responses while contextual associations are learned. As detailed below, in order to gain such evidence, we combined the ability to analyze trial-by-trial changes in the robust firing of highly selective MTL neurons (Quian Quiroga et al., 2005, 2008, 2009), with the rapid facility that humans have for learning complex associations and consciously declare them.

Patients first participated in a “screening session” (Quian Quiroga et al., 2005) in which a large number of images of people, animals, and places were presented to find out which (if any) of the recorded neurons responded to a picture. Data processing (spike detection, sorting, and identification of responsive cells) was done quickly (typically within 1 hr) and 3 to 8 (median 7) pairs of pictures were selected. Each pair consisted of a picture of a person (or animal) and a picture of a landmark, for which there was a neuron firing to one of them (the preferred “P” stimulus) and not to the other one (the non-preferred “NP” stimulus). For each pair, we created contextual “composite” images, in which each individual was digitally extracted from the original picture and placed in front of the landmark, mimicking a real photo of seeing the individual at that landmark (Figure 1). Using presentations of the single and composite images of each pair, we evaluated changes in neural activity while subjects performed five consecutive tasks (Figure 1). First, to get an estimation of the pre-learning firing to each picture, in Task 1, the screening was repeated showing each of the single pictures for 1 s 6 times in pseudorandom order, and patients were asked to indicate whether the picture contained a human face or not. Then, a block of “learning and evaluation trials” (median of 15 trials) comprising interleaved tasks 2 and 3 were shown. In Task 2, the composite images (each of

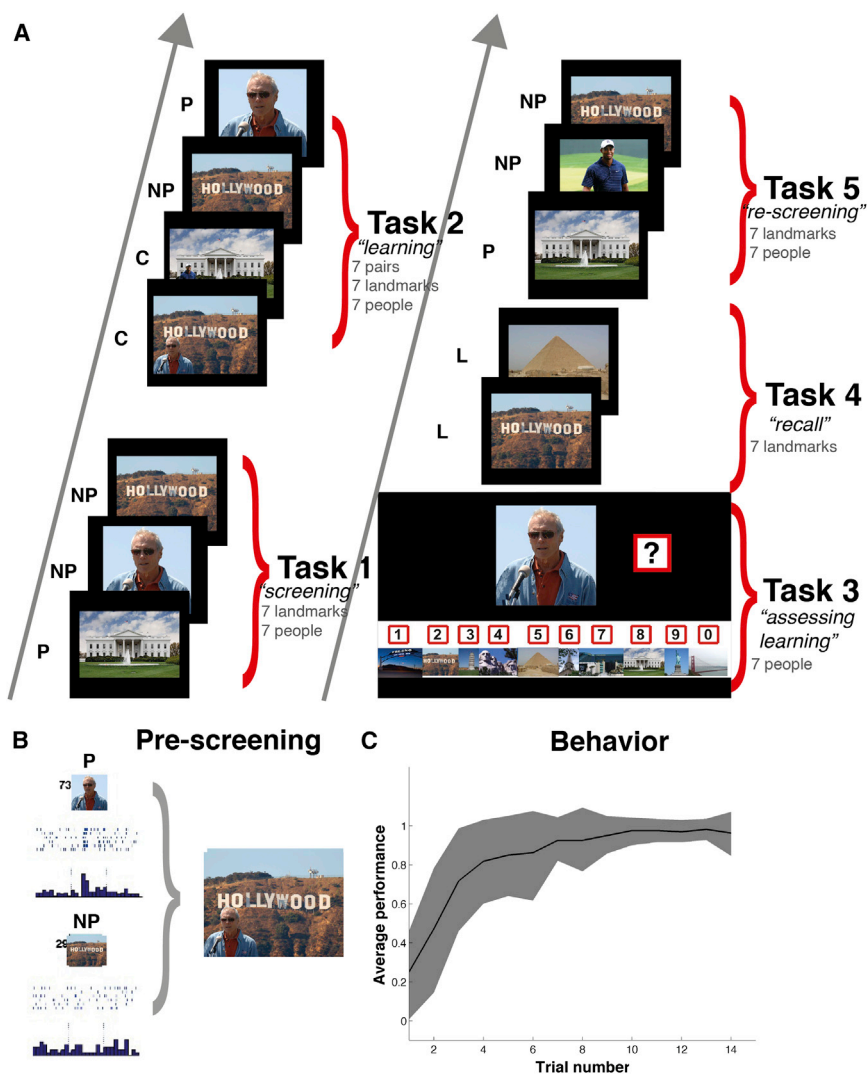

**Figure 1. Experimental Design and Behavioral Results**

(A) Structure of the association task. P, preferred stimulus; NP, non-preferred stimulus; C, composite stimulus; L, landmarks.

(B) Selection of stimuli. In this example, in a previous recording session (performed prior to the tasks in A to determine pictures eliciting responses in the neurons), we identified one single unit that responded to a picture of the American actor Clint Eastwood (P) and did not change its firing rate in response to the picture of the Hollywood sign (NP). The preferred (P) and non-preferred (NP) stimuli for each neuron were used to create contextual pictures as the one shown (median 7 pairs, 3–8 pairs per session).

(C) Grand average learning curve (mean  $\pm$  SD) for all pairs in 25 sessions performed by 14 patients. Trial number refers to trials during Task 3, where learning was assessed. Note the high variability across sessions.

rons using electrodes implanted in the MTL for clinical reasons. Figure 2 shows a neuron in the hippocampus that responded strongly to the picture of a member of the patient's family (with a mean firing rate of 13.1 spikes/s, SD = 3.9, median = 12.5) but not to the Eiffel tower (3.6 spikes/s on average, SD = 3.4, median = 3.3). The firing to the Eiffel tower during the response period did not differ significantly from the one during baseline (3.9 spikes/s on average, SD = 2.0, median = 4.2), according to a Wilcoxon rank-sum test ( $p = 0.84$ ,  $W = 40.5$ ,  $n_1 = n_2 = 6$ ). With our experimental design, we aimed to establish whether MTL neurons will widen their tuning to encode the

them being a specific person in a specific place) were presented in pseudorandom order, which were then followed by the presentation of the single pictures, also in pseudorandom order. The instructions were the same as in Task 1 (i.e., indicate presence of a human face). After each run of Task 2, the learning of associations was tested in Task 3 (the patient was presented each face at a time and had to select the landmark corresponding to it). After Task 2 and Task 3, in Task 4 the patient was presented 6 times each landmark in pseudorandom order and had to name the person that was there. Finally, in Task 5 ("re-screening") all single pictures were presented again in pseudorandom order, to compare with Task 1 (before learning). Typically, the entire experiment lasted between 25 to 30 min.

## RESULTS

### Firing Patterns of Single Cells during Learning

In 14 patients, who participated in 25 experimental sessions (and only 22 for Task 5), we recorded the activity of multiple single neu-

formed association by selectively increasing their firing to the associated stimulus. After a single exposure of the composite picture, the subject learned the association (i.e., family member at the Eiffel tower) and the firing rate in response to the Eiffel tower increased to 7.6 spikes/s on average (SD = 5.1, median = 8.3), a 230% increase compared to the presentations of the Eiffel Tower before learning took place (Task 1). This difference was significant ( $p = 0.002$ ,  $W = 563$ ,  $n_1 = n_2 = 27$ , Wilcoxon rank-sum test between baseline and response periods, see [Experimental Procedures](#)). In contrast, the response to the preferred stimulus (family member) did not change significantly after learning the association (9.4 spikes/s, SD = 4.5, median = 10.8) and it was similar to the response to the composite image of "family member at the Eiffel tower" (7.8 spikes/s, median = 8.3;  $p = 0.96$ ,  $W = 325$ ,  $n_1 = 27$ ,  $n_2 = 15$ , Wilcoxon rank-sum between the response to the Eiffel tower and the composite image). In order to verify that the increase in firing after learning was specific to the associated stimulus pair (NP) and not common to other stimuli used in the experiment, for example, due

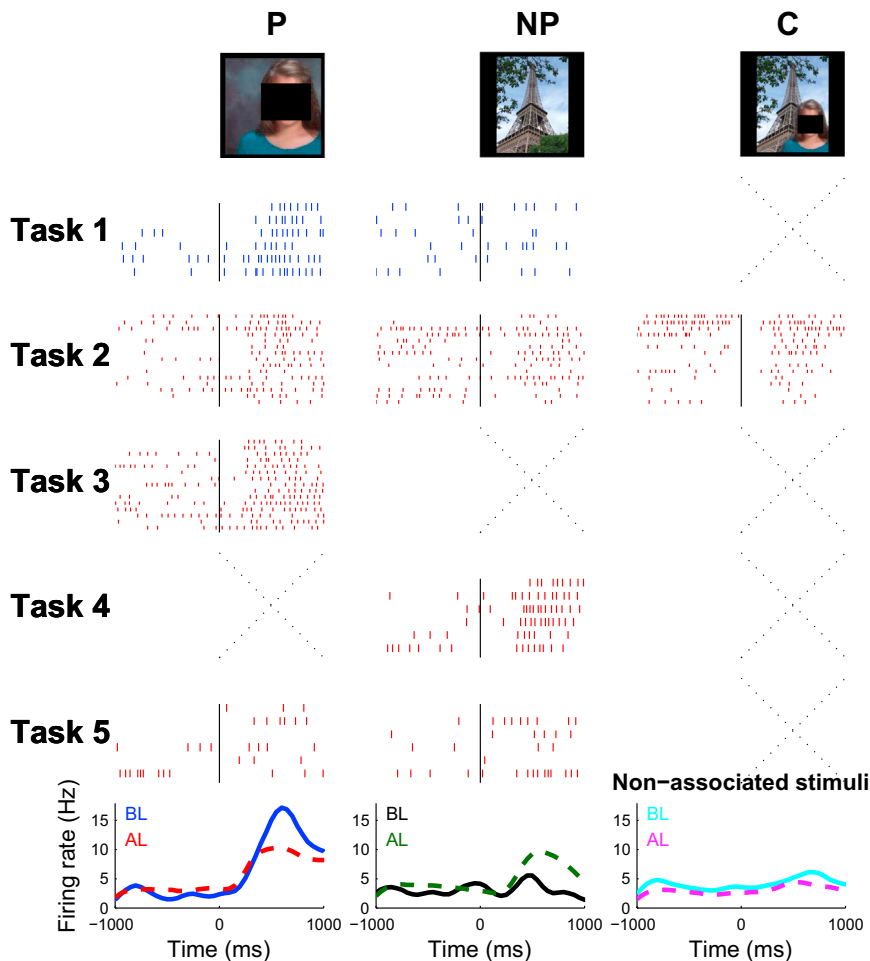

**Figure 2. Exemplary Response in the Hippocampus**

A unit in the left hippocampus of participant 14 was activated with a response of 13.1 spikes/s when the image of the patient's family was presented (preferred stimulus, black squares have been added for privacy reasons). The same cell was not responsive (response: 3.3 spikes/s) to the image of the Eiffel tower before learning (Task 1). For each task the corresponding raster plots (ordered from top to bottom) of each picture are given. Blue rasters represent pre-learning (Task 1) or incorrect trials. Red rasters represent correct or post-learning (Task 5) trials. The spike density function in response to the non-preferred (left), preferred (middle), and to the mean of the non-associated stimuli (average over 7 pictures) are shown at the bottom panels. Crosses indicate that the stimulus was not shown during a given task. After single-trial learning (Tasks 2, 3, and 4), the unit fired strongly to the picture of the patient's family (mean: 10.8 spikes/s, left), to the composite picture (7.8 spikes/s, right) and to the picture of the Eiffel tower (7.6 spikes/s). There was a 230% increase in firing to the non-preferred stimulus. The response to the non-associated stimuli slightly decreased from 5.3 spikes/s before learning to 3.6 spikes/s after learning.

to an increase in familiarity, we also examined the response to the other stimuli. For each neuron X with a preferred stimulus Px and a non-preferred stimulus NPx, we defined the non-associated (NA) stimuli for neuron X to be all the other pictures used in the association experiment corresponding to the same category of the NPx stimulus (person or landmark). The bottom-right plot of Figure 2 shows the average response to all the NA stimuli, which decreased from a mean of 5.3 spikes/s (SD = 5.6) to 3.8 spikes/s (SD = 4.9) after learning.

For some other units, the association was established the other way around, i.e., a neuron initially responding to a landmark changed its firing to the associated person after learning. Figure 3 shows a multi-unit in the parahippocampal cortex that, in Task 1 (before learning), originally fired to an image of the White House (mean = 17.8 spikes/s, SD = 7.2, median = 15) and not to American beach volleyball player Kerri Walsh (mean = 5.0 spikes/s, SD = 3.6, median = 3.3). After the patient learned the association between these two concepts (trial 1 in Task 2, see Experimental Procedures for learning criterion), there was an increase in the firing of the neuron to the picture of Kerri Walsh (mean = 13.8 spikes/s, SD = 9.2, median = 14.2), which was statistically significant ( $p < 0.05$ , Wilcoxon rank-sum test between baseline and response periods). This increase in the neuron's response to Kerry Walsh (NP

stimulus) after learning was observed in all tasks: a mean of 12.9 spikes/s in Task 2 (post-learning trials only), 16.7 spikes/s in Task 3, and 9.4 spikes/s in Task 5. The response to the preferred stimulus (the White House) increased slightly after learning to 25.6 spikes/s (SD = 8.9), but this difference was not significant (Wilcoxon rank-sum test). Additional examples are shown in Figure S1 and Movie S1.

### Population Responses

We recorded from a total of 613 units (438 multi-units and 175 single units) from the hippocampus (138 units), entorhinal cortex (117 units), amygdala (194 units), and parahippocampal cortex (164 units). We first identified visually responsive units, defined as those that, before learning, showed a significant difference in the response to at least one stimulus using a Wilcoxon rank-sum test between baseline and response (see Experimental Procedures). Altogether, we found 51 visually responsive units (31 single units and 20 multi-units) that significantly increased their firing rate in response to the preferred stimulus (P), with P being one individual (27 units) or landmark (24 units). Figure 4 shows the population results for all visually responsive units. Figure 4A shows the increase in response strength (comparing before and after learning) for each of the 51 visually responsive units and for all stimuli. The population averages are shown at the bottom of Figure 4A for all types of stimuli, where we observe a larger increase in firing after learning for the NP compared to the other stimuli. The change in firing rate after learning (see "Visually Responsive Units" in Experimental

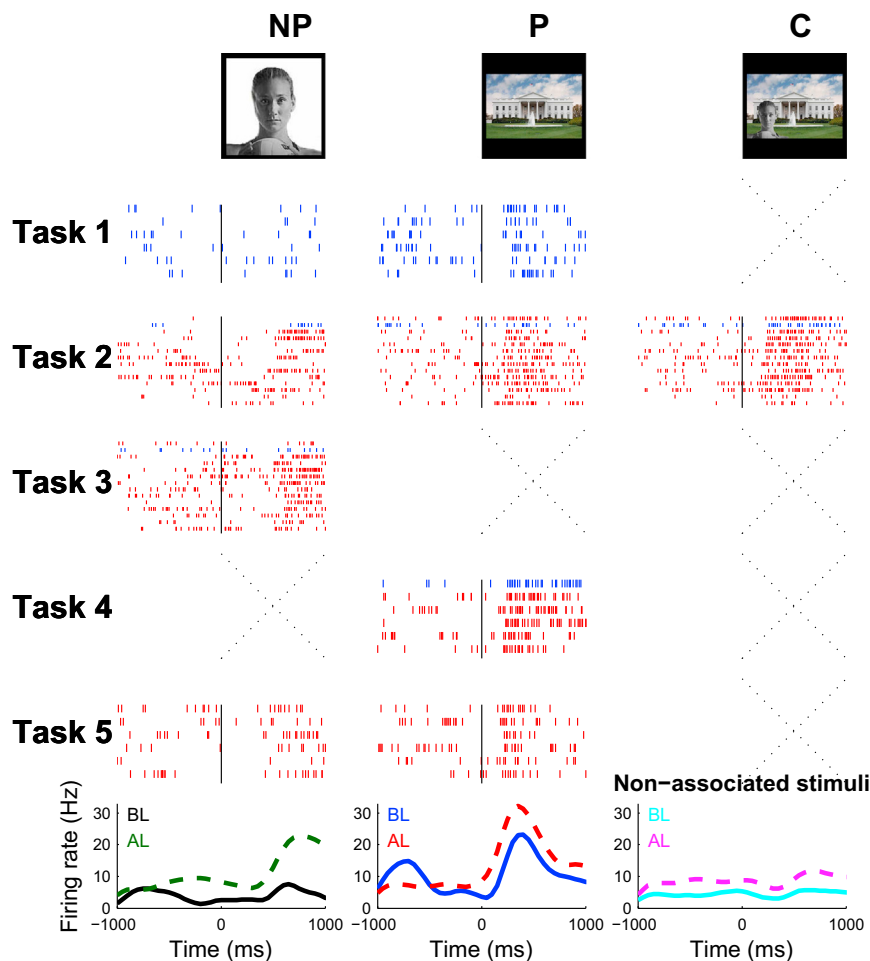

**Figure 3. Exemplary Response in the Parahippocampal Cortex**

Conventions are the same as in Figure 2. A multi-unit in the parahippocampal cortex of participant 3 fired at a rate of 17.8 spikes/s (SD = 7.2) to the picture of the White House (preferred stimulus) from a baseline of 4.4 spikes/s (SD = 4.0). This cell only fired at a rate of 5.0 spikes/s (SD = 3.6) to the picture of the American volleyball player Kerri Walsh before learning (Task 1). After learning (trial 1 in Task 2), the cell selectively increased (by 246%) its response to the pair associate (mean response: 13.8 spikes/s, SD = 9.1,  $p < 0.05$ ).

Procedures) was significantly different for the different stimuli according to a one-way ANOVA  $F(11,492) = 3.15$ ,  $MSE = 0.46$ ,  $p = 0.0001$  ( $n = 42$  cells with at least 12 stimuli—9 units that corresponded to sessions where less than 12 stimuli were presented were excluded from this analysis to avoid unbalanced data). This significant difference was largely due to the change in the NP stimuli and not any other non-associated stimulus. In fact, the difference was still significant when excluding the P stimuli ( $p = 0.01$ ) but not when also excluding the NP stimuli ( $p = 0.76$ ). Moreover, the only two stimuli that showed a median significantly different from zero were the preferred stimulus (decrease,  $p = 0.001$ ; see below for interpretation in terms of repetition suppression) and the NP stimulus (increase,  $p = 0.005$ ). Furthermore, paired  $t$  tests showed that the increases in the NP responses were significantly larger than the ones to any other stimulus (all  $p$  values between 0.0008 and 0.03). To further validate these results, we performed a permutation test, adjusted for multiple comparisons, by shuffling the labels of the stimuli and taking as test statistic the smallest difference between the activity to the NP stimulus and the one to any other stimuli. We ran 5,000 permutations and found the  $p$  value of the NP stimulus to be statistically significant ( $p = 0.012$ , see Supplemental Experimental Procedures

for details). Of all the 613 units that we recorded from, 51 were visually responsive and 562 were non-responsive (i.e., did not have a significant response compared to baseline before learning). Of the 562 non-responsive units, 12 (2.1%) exhibited a significant increase to at least one image (mean = 4.1 images, SD = 1.5) after learning took place, according to a Wilcoxon rank-sum test between the baseline and response periods. This number is within what could be expected by chance ( $n = 28$ ) with a false positive rate of 0.05. Only three of the non-responsive units had a change in response to an association pair (P and NP) that was larger than the one to the other pictures (Wilcoxon rank-sum test,  $p < 0.05$ ). To further quantify the responses of all visually responsive

neurons (to all of the presented stimuli), we calculated a pair-coding index (PCI), a correlation coefficient for each neuron between the mean response to each stimulus and its paired associate (as defined in Higuchi and Miyashita, 1996). This statistic has been used to assess how neurons acquire stimulus selectivity through associative learning and is expected to approach zero for a large number of neurons firing with a pattern independent of the stimulus pairs (Naya et al., 2003). Across the population of visually responsive units, we found that the pair-coding indices after learning (median = 0.35) were significantly higher (median =  $-0.03$ ,  $D = 0.36$ ,  $n_1 = n_2 = 42$ ,  $p = 0.007$ , Kolmogorov-Smirnov test, see Figure 4B), thus showing the formation of an association between the P and NP stimulus pairs.

To assess the changes that occurred in different tasks, we calculated, for the whole population of visually responsive units, an average differential activity index  $DAI = (P_r - NP_r) / (P_r + NP_r)$ , where  $P_r$ ,  $NP_r$  denote the mean activity in the response interval (see Experimental Procedures). The DAI is expected to be positive, since  $P_r > NP_r$ , and it quantifies the difference in the response to the preferred and non-preferred stimuli. As expected, the largest DAI values were obtained for Task 1 (Figure 4C) before learning took place, indicating a large difference in the response to the P and the NP stimuli. For the following

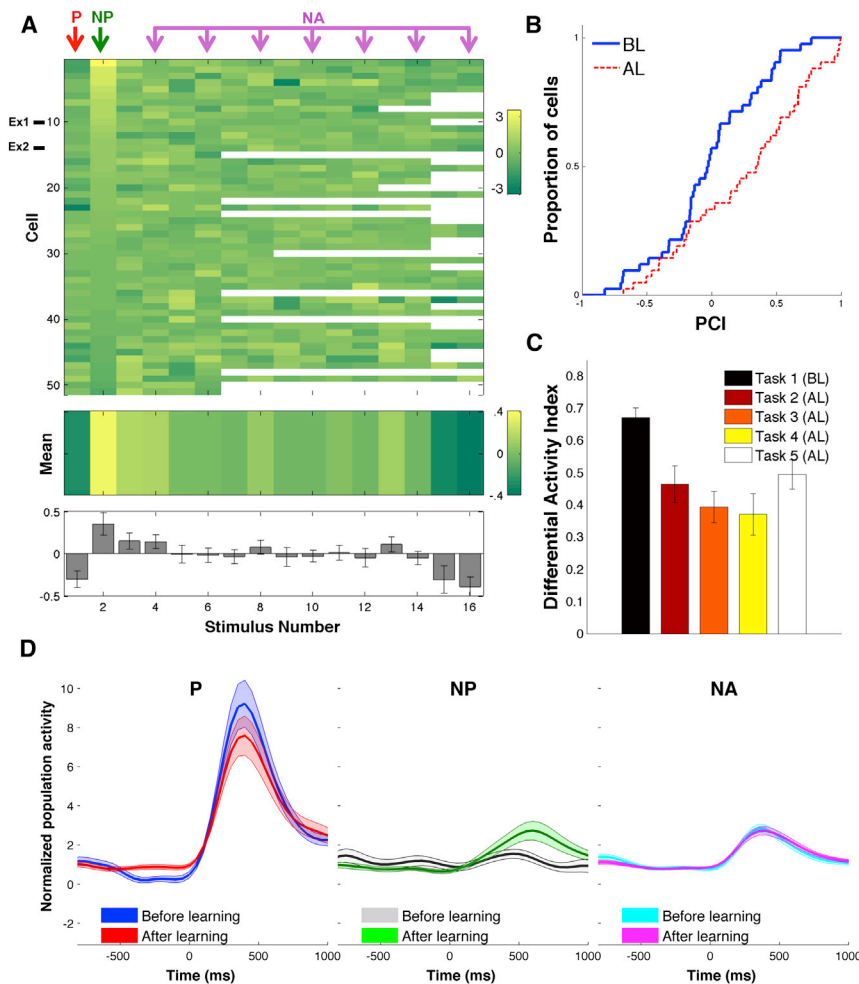

**Figure 4. Population: Visually Responsive Units**

(A) Response changes for all visually responsive units. Each row represents one cell and each column represents one stimulus. The rows were sorted by the strength of the change in the NP stimulus and the columns were unsorted. Blank squares represent stimuli that were not shown during the corresponding session. The mean values across all cells are shown in the middle panel (in colors) and in the bottom panel including SEMs. Ex1, Ex2 correspond to the exemplary units shown in Figures 2 and 3.

(B) Cumulative frequency histograms of the correlation coefficient (defined as in Higuchi and Miyashita, 1996) for units before learning (BL) and after learning (AL). Correlation coefficients were significantly higher after learning than before learning ( $p = 0.007$ , Kolmogorov-Smirnov test).

(C) Average differential activity index  $DAI = (P_r - NP_r / P_r + NP_r)$  for all tasks. Lower values of DAI denote more similar responses. Responses to the preferred and non-preferred stimuli become more similar after learning for all tasks ( $p < 0.001$ , average decrease by a factor of 1.6, range: 1.4–1.8).

(D) Average normalized spike density function (SDF) for 51 visually responsive units to the P, NP, and NA before and after learning. There was a significant increase in the response strength to the NP stimuli after learning ( $p < 0.05$ , Wilcoxon rank-sum test).

tasks, DAI values were significantly smaller ( $p < 0.001$ , see Experimental Procedures).

To study the time course of the responses, we separated the normalized population response for all visually responsive neurons according to the type of stimuli (P, NP, and NA) and condition (before and after learning). After learning (Figure 4D), we found a 172% increase in the response strength to the NP stimuli compared to the pre-learning value. This increase was statistically significant ( $p = 0.05$ ,  $n = 51$ , Wilcoxon rank-sum test between the mean response before versus after learning). In contrast, the mean response to the preferred stimuli decreased to 87% of its pre-learning value ( $p = 0.3$ ,  $n = 51$ , Wilcoxon rank-sum test), while the mean response to the non-associated stimuli did almost not change (101% of the pre-learning value,  $p = 0.9$ ,  $n = 51$ , Wilcoxon rank-sum test).

Given these population results, we next evaluated how many of the visually responsive neurons encoded the enforced associations. For this, we defined “pair-coding neurons” as the ones that: (1) showed a significant response to the NP stimulus after learning, using a Wilcoxon rank-sum test comparing baseline and response periods (with  $p < 0.05$ ), and (2) the distribution of increases of single-trial responses to the NP stimulus after learning was larger than the distribution of increases of single-

trial responses to all the other pictures (excluding P) after learning (see “Pair-Coding Units” under Experimental Procedures). Of the 51 visually responsive units, 21 (41%) were “pair-coding neurons” and selectively increased their response to the NP stimuli after learning. As expected by construction—since based on the screening sessions we chose the NP stimuli to be one that the neuron originally did not fire to—these units showed no significant response to the NP stimuli before learning took place (Wilcoxon rank-sum test). The number of neurons encoding the association (pair-coding neurons,  $n = 21/51$ ) far exceeded the number expected by chance ( $p < 10^{-13}$ ), according to a binomial test with a chance level of 0.05 (see Supplemental Experimental Procedures). We also verified that the observed distribution of  $p$  values was significantly lower than the one generated by neurons with a Poisson firing probability and the same mean firing rates as the responsive units ( $p < 0.004$ ; see “Proportion of Pair-Coding Units” under Supplemental Experimental Procedures).

In what follows, we concentrate on the 21 neurons that encoded the associations. Among the 21 pair-coding units, 14 (67%) originally fired to a person and started firing to the associated landmark after learning (like the one shown in Figure 2). In the remaining 7/21 cases, the association was established the other way around, i.e., the neuron originally responding to a landmark, changed its firing to the associated individual after learning (like the one shown in Figure 3). Across the population

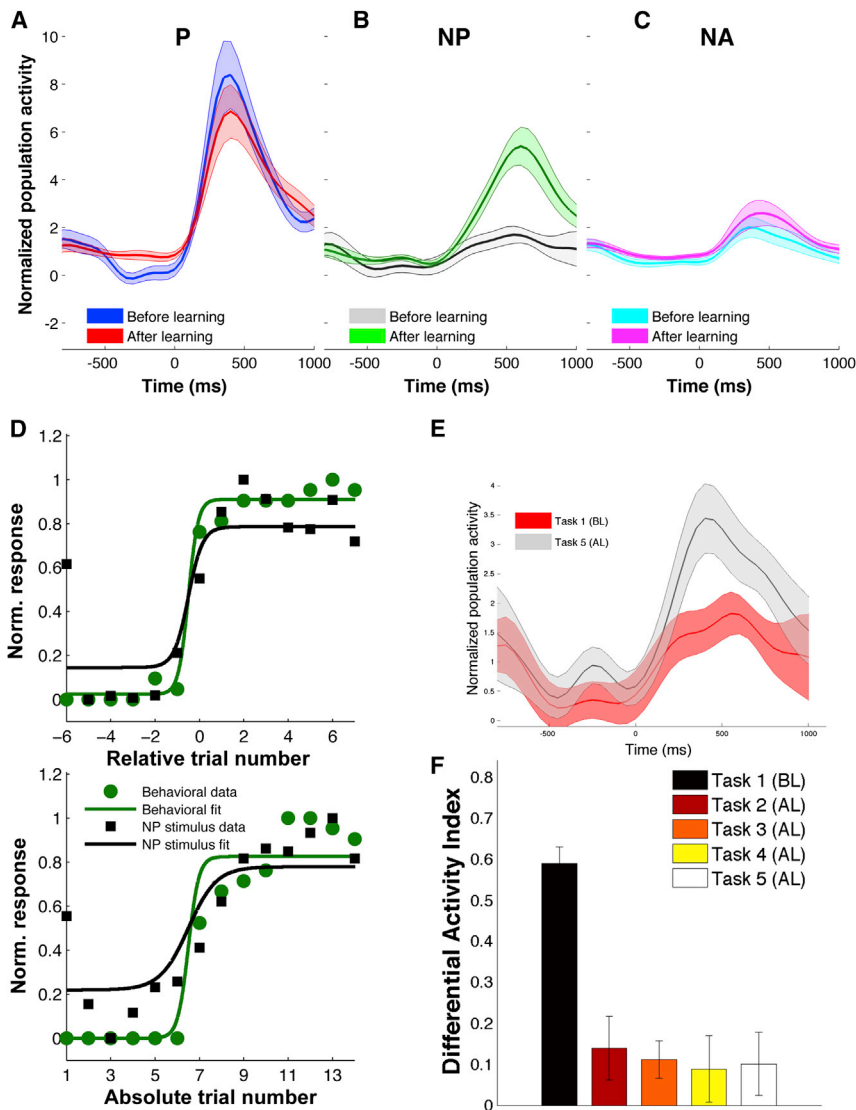

of pair-coding neurons, the responses to the non-preferred stimuli showed an average increase of 281% (from  $1.44 \pm 0.22$  to  $4.06 \pm 0.38$ , mean  $\pm$  SEM) after learning, which was statistically significant ( $p < 10^{-5}$ ; Wilcoxon rank-sum test between the mean response before versus after learning) (Figure 5B). Similar results were obtained when considering only single units ( $n = 11$ ). In this case, there was a significant increase of 412% in the response to the NP stimuli after learning ( $p = 0.0001$ , Wilcoxon rank-sum test). In line with the results for all visually responsive units (Figure 4C), the responses to the P (Figure 5A) and NA (Figure 5C) stimuli did not change significantly after learning (88% of the pre-learning value,  $p = 0.65$  for the P stimulus and 134% of the pre-learning value,  $p = 0.27$  for the NA stimuli).

### Neuronal and Behavioral Learning Curves

In order to compare on a trial-by-trial basis the neural and behavioral changes, we calculated the neuronal learning curves by re-

scaling the activity across the population of neurons encoding the association for all trials in all tasks to the range 0–1 (see Experimental Procedures). A direct comparison between the behavioral and neural learning curves exhibited a significant positive correlation for the non-preferred stimulus ( $r = 0.25$ ,  $p < 10^{-11}$ , Pearson's correlation coefficient  $r$ ), due to the increase in firing after learning the associations. There was a non-significant correlation for the non-associated stimuli ( $r = 0.05$ ,  $p = 0.2$ ) and also a negative correlation for the preferred stimulus ( $r = -0.08$ ,  $p = 0.03$ ), consistent with the decrease in firing to the preferred stimulus reported in Figure 4A, which is likely due to repetition suppression in line to a previous work without an association paradigm (Pedreira et al., 2010). To further investigate whether this behavior is due to repetition suppression, or whether it also reflects the formation of associations, we compared the decreases found in pair-coding units with the ones found in the other visually responsive units. For this, for each visually responsive unit, we calculated the percentage change as  $100 \cdot (P_{\text{post}} - P_{\text{pre}}) / P_{\text{pre}}$ , where  $P_{\text{post}}$  and  $P_{\text{pre}}$  indicate the mean activity in the response window. Both populations of pair-coding and non-pair-coding units exhibited similar trends, with a mean percentage decrease of  $-7\%$  (SD = 40,

median = -15%) for the pair-coding units and -11% (SD = 33, median = -20%) for the non-pair-coding units. The median of both populations did not differ significantly ( $p = 0.64$ , Wilcoxon rank-sum test) and the median of both populations differed significantly from zero ( $p = 0.03$  and  $p = 0.02$  for pair-coding and non-pair-coding, respectively), thus the decreases for the P stimuli seem to reflect repetition suppression rather than an encoding of the association.

Given the variability on the number of trials that subjects needed to learn each association pair, to further evaluate how tightly correlated were the observed firing changes to the actual learning of the associations, we realigned the response of each cell to the learning time and compared these neural responses to the ones obtained as a function of the actual trial number in the experimental session. For this, we fitted logistic functions to the average behavioral and neural learning curves to the non-preferred stimulus for both alignments (absolute trials and relative to learning time; see [Experimental Procedures](#) for details). In [Figure 5D](#), we first observe that aligning to learning time gives a more accurate matching between the behavioral and the neural learning curves. In fact, for data aligned to learning there were no significant differences between behavioral and scaled neural data (Kolmogorov-Smirnov test,  $p = 0.59$ ). Additionally, the fits were more accurate for data aligned to learning time, as quantified by the Akaike Information Criterion (AIC) (Akaike, 1974)—data relative to learning:  $AIC^{Beh} = 142$ ;  $AIC^{Neu} = 298$ ; data not aligned:  $AIC^{Beh} = 175$ ;  $AIC^{Neu} = 325$ , where smaller values denote higher accuracy. The same logistic model did not fit the data for the preferred and non-associated stimuli as accurately as it did with the non-preferred stimuli ([Figure S2](#)). Moreover, both for the P and NA, Pearson's correlation coefficient was larger for the unaligned ( $R^2 = 0.73/0.04$  for P/NA stimuli) than for the learning-aligned data ( $R^2 = 0.46/0.03$ ). When the NP data were aligned to learning time, there was a large increase in the slope of the behavior curve:  $\beta^{Beh} = 4.6$  after re-alignment, compared to  $\beta^{Beh} = 4.2$  for the unaligned data. But the interesting fact was that this change in the behavioral learning curve was accompanied by an abrupt increase in firing to the non-preferred stimuli, when re-aligning the neural data to the learning time:  $\beta^{Neu} = 3.1$  aligned to learning, compared to  $\beta^{Neu} = 1.6$  without alignment. The slope difference (with and without alignment to learning) was significant, according to a non-parametric bootstrap test ( $p < 0.05$ ; see [Figure S3](#) and [Experimental Procedures](#) for details).

### Neural Activity during Different Tasks

Next, to rule out that changes in neuronal responses were just driven by one of the specific tasks we used (as each task varied in complexity and attentional demand) and not by the formation of new associations, we used the differential activity index DAI introduced before for the population of visually responsive units. Altogether, after learning there was a decrease of DAI values by a factor of 5.5 on average (range: 4.2–6.7). Moreover, differences between the tasks *after learning* were not significant, thus suggesting that these neuronal changes were not task dependent. Supporting this view, a direct comparison of the response to the non-preferred stimuli in the two identical tasks (Task 1, pre-screening and Task 5, re-screening) showed significant dif-

ferences ( $p = 0.001$ , [Figure 5E](#)), which can be attributed to the learning of the particular association. There was also an increase in the response during Task 5 when considering all visually responsive units but in this case the difference was not significant ( $p = 0.14$ ).

### Decoding Analysis

From a readout viewpoint, the learning of the associations should be accompanied by a decrease in the discriminability between the NP and the P stimulus, given that the neuron originally firing only to the P stimulus starts also firing to the NP after learning. This selective increase in firing to the NP stimuli should also lead to more discriminability between the NP and NA stimuli after learning. This is indeed what we observed using a linear classifier to decode the identity of the stimuli before and after learning (see [Supplemental Experimental Procedures](#)). When considering the whole population of visually responsive units, the discrimination between P and NP stimuli went down from a 74% average performance before learning to 68% after learning. The decrease was significant according to a paired t test,  $t(100) = 1.95$ ,  $p = 0.03$ . For pair-coding units, the discrimination between P and NP stimuli went down from a 72% average performance before learning to 56% after learning. Altogether, the decoding performance was significantly larger than chance with  $p < 0.05$  (see [Supplemental Experimental Procedures](#)) for 11 of the 21 responses (52%) before learning and for 6 of the 21 responses after learning (38%).

### Latency Analysis

Two possible mechanisms can in principle account for the increased response to the NP stimuli after learning. On the one hand, neurons can rapidly change their tuning and start firing to the NP stimuli directly—that means, a neuron originally encoding the P stimulus starts encoding the NP stimulus after learning—in which case, the time courses of both P and NP signals are expected to be similar. On the other hand, the NP stimuli can act as a cue to evoke the representation of (and in turn the neuron's firing to) the P stimuli. Following previous works (Naya et al., 2001, 2003), we distinguished between these two putative mechanisms—namely between Type 1 and Type 2 neurons—by analyzing the differences in the latency response onsets between the NP and P stimuli. In the first case (Type 1), we expect similar latency onsets for the P and NP stimuli, whereas in the other case (Type 2), we expect a larger latency onset for the NP stimuli. We used Poisson spike train analysis (see [Experimental Procedures](#)) to estimate the onset latency for all presentations and performed a Wilcoxon rank-sum test to compare the latency values for the P and NP stimuli. Of the 21 pair-coding units that selectively increased their firing to the NP stimuli after learning, 13 were “Type 1,” as in the example shown in [Figure 2](#), and the remaining 8 were “Type 2,” as in the example shown in [Figure 3](#). The scatter plot of the response onset latency values with the classification details is shown in [Figure S4](#). Interestingly, both Type 1 and Type 2 units exhibited a significant positive correlation between behavioral performance and neural activity for the NP stimulus (Pearson's  $r = 0.24$ ,  $p = 10^{-7}$  and  $r = 0.28$ ,  $p = 4 \times 10^{-6}$  for Type 1 and Type 2, respectively).



### Regional Analysis

Altogether, we identified 51 visually responsive units across different regions within the MTL: 10 in hippocampus, 7 in the entorhinal cortex, 29 in the parahippocampal cortex, and 5 in the amygdala. We observed pair-coding units throughout the MTL: (6 out of 10 [60%] visually responsive units in the hippocampus), 4 out of 7 (57%) in the entorhinal cortex, 11 out of 29 (38%) in the parahippocampal cortex, and 1 out of 5 (40%) in the amygdala. We consistently found both Type 1 and Type 2 neurons in these regions: 4 out of 8 pair-coding units in H/EC were of Type 1, where we have grouped responses in hippocampus and entorhinal cortex that were previously shown to exhibit similar properties (Mormann et al., 2008; Quian Quiroga et al., 2009). In PHC, 7 out of 11 pair-coding units were of Type 1. Pair-coding cells in H/EC were more prominently firing to pictures of persons instead of landmarks (6 out of 8 pair-coding units) compared to cells in PHC ( $n = 7$  out of 11) but the difference was not significant ( $\chi^2 = 0.28$ ,  $p = 0.60$ ). Despite the small sample size of the recorded neurons, we found that the time courses of the responses in PHC were qualitatively similar to the ones in H/EC (Figure S5). As a cautionary note, we wish to point out that a larger number of recorded neurons is necessary to address the issue of regional differences (and similarities) more conclusively.

### DISCUSSION

Episodic memory—the ability to consciously recall personal experienced events and situations (Moscovitch, 1994; Tulving, 2002)—relies on the very rapid and effortless formation of new associations (Bunsey and Eichenbaum, 1996; Quian Quiroga, 2012; Wirth et al., 2003; Kahana et al., 2008). Animal studies have previously shown that single neurons can change their selectivity after learning in associative tasks (Erickson and Desimone, 1999; Gochin et al., 1994; Messinger et al., 2001; Sakai and Miyashita, 1991; Wirth et al., 2003). In particular, Miyashita and colleagues trained macaque monkeys to associate pairs of fractal patterns and found picture-selective neurons in IT cortex (areas TE and perirhinal cortex) that showed significantly correlated responses to the paired associates (Sakai and Miyashita, 1991). This coding was later hypothesized to emerge from separate TE neurons coding perceptual information about the individual paired associates that would converge onto the same neurons in the perirhinal cortex (the selective-convergence model) (Higuchi and Miyashita, 1996; Naya et al., 2001, 2003). But the learning of paired associates in animals is a demanding task that requires extensive reward-driven training, typically taking place before recordings begin (Erickson and Desimone, 1999; Higuchi and Miyashita, 1996; Sakai and Miyashita, 1991). Moreover, these recordings were performed in extra-hippocampal regions, which show distributed representations and are not thought to support fast learning according to modeling studies (McClelland et al., 1995). One notable exception was reported by Wirth and colleagues (Wirth et al., 2003; Yanike et al., 2004), who demonstrated a significant correlation between behavioral performance and neuronal hippocampal activity during the acquisition of associations between background scenes and

specific actions (a saccade toward one of four cardinal locations). However, in this case the task also involved explicit reward-driven training, and learning occurred in two-thirds of the cases only after 14–17 trials (Wirth et al., 2009). These time-scales are longer than the ones concomitant with episodic memory, which is seemingly effortless and often triggered by single presentations.

Besides the need of reward-driven training, a major caveat to develop animal models of episodic memory is the lack of verbal or complex feedback to assess conscious recollection. In an earlier study, we showed that neurons in the human MTL respond in a reliable and specific manner during viewing of video episodes such as a clip of *The Simpsons* and also during the free conscious recall of that same clip (Gelbard-Sagiv et al., 2008). Human MTL neurons have also been reported to act as novelty and familiarity detectors (Rutishauser et al., 2006). A recent work (Miller et al., 2013) has studied modulations in the firing of place-responsive neurons in the human MTL while subjects learned item-location associations during a virtual navigation task followed by free recall. The authors calculated a neural similarity index between the ensemble activity of these place cells during navigation and during item recall and found that such index was higher for the ensemble of place cells near the location of the item. Considering the previous finding that MTL neurons show an invariant representation of concepts (Quian Quiroga et al., 2005), our results of association formation in these neurons suggest conceptual associations. In particular, we show: (1) the encoding of associations at the single-cell level, (2) the learning of the associations on a trial-by-trial basis (showing the emergence of robust responses at the exact moment of learning), (3) the precise latency of the responses, distinguishing two type of neurons, (4) the neurons' responses in different tasks, including free recall, also comparing the exact same task before and after learning (Task 1 versus Task 5), (5) that these changes were specific to the associated (compared to the other non-associated) stimuli, and (6) a decoding approach provided differences in discrimination performance after learning consistent with our other analyses. Overall, by showing that such associations can be created with arbitrary but conceptually coherent concepts (i.e., persons in particular scenes, in contrast to pair association tasks in which two arbitrary pictures are associated), our results provide strong evidence pointing toward a role of the MTL beyond a spatial representation of the environment. Moreover, the emergence of associations of concepts established after single trials linked to rapid neural activity changes is ideal for the creation of new episodic memories (Quian Quiroga, 2012).

How different MTL regions contribute to episodic memory formation is still a subject of intense discussion (Diana et al., 2007; Eichenbaum et al., 2007). Neuroimaging works have advocated that episodic encoding is mediated by the hippocampus, which supports the relational binding of the individual elements to the context of an episode (see Davachi, 2006; Quamme et al., 2007), and the parahippocampal cortex, which is involved in item memory (Kirwan and Stark, 2004) and/or in relational memory (Diana et al., 2007). The PHC has been shown to be involved in both spatial (Buffalo et al., 2006) and nonspatial contextual associations (Aminoff et al., 2007; Law

et al., 2005). Related lesion studies in animals have suggested that the hippocampus is important for item-item associations, while parahippocampal cortex is critical for recognition memory for object-place associations (Higuchi and Miyashita, 1996; Malkova and Mishkin, 2003). In line with these studies, we found pair-coding units not only in H/EC (8/21) but also in PHC (11/21).

A long-lasting debate in the psychology literature (Roediger and Arnold, 2012), refers to whether the formation of associations occurs gradually (Hull, 1943) or all-or-none (Estes et al., 1960; Rock, 1957). In the first case, the strength of association between each pair develops gradually until the first item produces a recall of the second. This assumes that learning reflects a continuous buildup of the strength of memory traces. Alternatively, association pairs could be learned at once and repeated trials are just giving several opportunities for the formation of the association (Estes et al., 1960). In line with the latter view, the formation of associations to NP stimuli changed abruptly, with a large increase in the slope of both the behavioral and neural learning curves, thus supporting all-or-none learning. A majority of neurons that changed their tuning after learning had a similar response-onset latency for the P and NP stimuli (Type 1), thus suggesting the creation of associations by combining distinct concepts through partially overlapping representations—namely, some of the neurons initially encoding one concept started firing to the associated one after learning (Quian Quiroga, 2012). One could in principle relate gradual learning with Type 2 neurons—in other words, the later response onset latency of NP compared to P may imply a recall of P when showing NP. However, learning occurred in a median of 1 trial for Type 2 neurons (and a median of 2 trials for Type 1 neurons). So, rather than supporting gradual learning, Type 2 neurons could be showing an evoked representation based on associations created using partial overlapping representations by Type 1 neurons (and it is also plausible to expect that after more repetitions the latency difference between P and NP may disappear). Importantly, associations were encoded by widening the tuning of neurons previously encoding one of the concepts, rather than by recruiting new neurons encoding each association because less than 1% of the initially non-responsive units started firing to a pair of associated images, compared to a 41% of visually responsive neurons that expanded their tuning to encode the associations.

Due to clinical constraints and day-to-day variability of the recordings, it is currently not possible to assess how the changes in neuronal tuning reported here may evolve at longer timescales (days, weeks, months, or years) to establish long-term memories and a robust encoding of related concepts. It seems, however, reasonable to postulate that this initial encoding of associations, established after single presentations, may be further consolidated with time in some cases but may also disappear in others, considering that a relatively large proportion of neurons encoded the associations. Although the inception of episodic memories—like remembering the context and sequence of salient events when meeting a friend at a particular café—goes beyond the formation of contextual associations, our study suggests a fundamental mechanism of neuronal plasticity that may support episodic memory formation.

## EXPERIMENTAL PROCEDURES

### Subjects

14 patients with pharmacologically intractable epilepsy (10 right handed, 6 male, 18 to 53 years old) participated in this study. Patients were implanted with chronic depth electrodes for 7–10 days to determine the seizure focus for possible surgical resection. The number and specific sites of electrode implantation were determined exclusively on clinical grounds and were verified by MRI or by computer tomography co-registered to preoperative MRI. Patients volunteered for the study and gave written informed consent. The study conformed to the guidelines of the Medical Institutional Review Board at UCLA.

### Electrophysiology

Each electrode contained nine platinum-iridium microwires at their end. Eight of the microwires acted as the active recording electrodes and the ninth microwire acted as a reference. The differential signal from the microwires was amplified and filtered between 1 and 9,000 Hz. Data from six patients were recorded with a 64-channel Neuralynx system with a sampling rate of 28 kHz. In the remaining eight patients, data were acquired at 30 kHz using a 128-channel acquisition system (Blackrock Microsystems). The extracellular signals were band-pass filtered (300 Hz to 3 kHz) and later analyzed offline. Spikes were detected and sorted using wave\_clus (Quian Quiroga et al., 2004). Single- and multi-unit activity was classified by one of the authors (M.J.I.) based on spike shape, variance, and the presence of a refractory period for the single units (i.e., <1% spikes within <3 ms interspike interval distributions) (Quian Quiroga et al., 2005).

### Experimental Sessions

Subjects sat in bed facing a laptop computer on which pictures were presented. In the screening sessions, they were instructed to respond whether the image showed a person or not with a button press. Approximately 105 pictures were displayed six times in pseudorandom order (Ison et al., 2011; Quian Quiroga et al., 2005).

In each recording session, a median of 8 (range: 2–28) of the recorded neurons responded to one or more pictures. Each of these responsive neurons fired to a median of 2 pictures (range 1–18 stimuli), which gives an average selectivity of 2.6% (range: 0.8%–30%), in agreement with values reported in a previous study showing an invariant representation by these neurons (Quian Quiroga et al., 2005). After each screening session, we selected a subset of the stimuli (mean: 14, range: 6–16) to create the images to be shown in the “association sessions,” as depicted in Figure 1 and described in the main text. Further information about these sessions can be also found in the [Supplemental Experimental Procedures](#). All the methods described below correspond to the analyses of the association sessions.

### Analysis of the Neural Data

#### Visually Responsive Units

For each image presentation, we considered two intervals based on the response latency of neurons recorded from the medial temporal lobe (Mormann et al., 2008): a baseline interval starting 500 ms before stimulus onset and ending 100 ms after stimulus onset and a response interval between 200 ms and 800 ms after stimulus onset. Responses were defined as the median firing rate in a segment (baseline/response) across trials (Quian Quiroga et al., 2005). We identified visually responsive units as those that significantly responded to at least one individual or landmark before learning took place. The criterion for significance of the response was based on a Wilcoxon rank-sum test (with  $p < 0.05$ ) between the baseline and response periods and we additionally required a median firing rate of at least 2 Hz following stimulus onset. For each stimulus presented (P, NP, and others), we quantified the firing rate changes after learning for stimulus “i” as  $\Delta_i = \text{Resp}_i(\text{AL}) - \text{Resp}_i(\text{BL})$ , using a Z score normalization for each unit and phase (BL/AL):  $\text{Resp}_i = (\text{mean}(\text{FR}_i) - \text{mean}(\text{FR}))/\text{SD}(\text{FR})$ .

#### Pair-Coding Units

We defined pair-coding units as the ones that selectively changed their response to the associated picture after learning (see below for the definition of learning time), fulfilling the following criteria: (1) they had a significant

increase in the response to the NP stimulus (the paired associate of the preferred stimulus) with respect to baseline after learning (Wilcoxon rank-sum test), and a non-significant response to NP before learning (Wilcoxon rank-sum test), and (2) the distribution of single trial increases after learning (i.e., subtracting the mean number of spikes before learning in the response window) for the NP stimulus was significantly larger than the distribution of single trial increases after learning for all the other pictures (excluding P) according to a Wilcoxon rank-sum test across trials.

#### Pair-Coding Index

We also used a pair-coding index defined using a correlation coefficient as in Higuchi and Miyashita (1996):  $CC = \sum [(x_i - \mu)(x_i' - \mu')]/\sqrt{\sum [(x_i - \mu)^2] \sum [(x_i' - \mu')^2]}$  ( $i = 1 - 12$ ), where  $x_i$  denotes the mean response for the  $i$ -th stimulus, and the  $i$ -th pictures are the ones belonging to the associated pair,  $\mu$  and  $\mu'$  are the averages of  $x_i$  and  $x_i'$ . This calculation was done over  $n = 42$  visually responsive units that correspond to sessions where at least 12 stimuli were shown.

#### Comparisons between Conditions

In the examples shown in Figures 2 and 3 and Figure S1, we used the raw data (number of spikes in the response window) and Wilcoxon rank-sum tests to compare between different conditions. For comparing the population responses before and after learning, we used normalized data (see "Time Courses of Behavioral and Neural Data") and Wilcoxon rank-sum tests between responses before and after learning.

#### Time Courses of Behavioral and Neural Data

To study the time course of the responses, we built the spike density function by convolving each spike train with a Gaussian kernel (width = 100 ms). For the analyses at the population level we normalized the firing rates for each neuron by calculating a Z score for each 50 ms width bin:  $z = FR_{response} - FR_{baseline}/SD_{baseline} + \eta$ , where  $FR_{response}$  is the smoothed firing rate in the bin,  $FR_{baseline}$  is the mean firing rate during the baseline period,  $SD_{baseline}$  is the standard deviation of firing rates averaged for all trials, and  $\eta = 0.1$  is a regularization term. We obtained the normalized population response by averaging the Z scores of a given neuron in response to a stimulus type (preferred, non-preferred, non-associated) and averaging over all the trials depending on the analysis (e.g., pre-learning trials, post-learning trials, all trials in a given task).

#### Differential Activity Index

To quantify the difference in firing in the different tasks, we computed a differential activity index  $DAI = (P_r - NP_r / P_r + NP_r)$ , considering the mean activity in the response interval of the normalized response (where  $P_r$  and  $NP_r$  are the mean normalized responses to the preferred [P] and nonpreferred [NP] stimuli, respectively). We used z tests to assess the significance of the difference in the DAI across different tasks (Figure 5F).

#### Latency Estimation

Onset latencies for responsive units were determined by Poisson spike train analysis (Hanes et al., 1995; Mormann et al., 2008). To compare the latency values for the P and NP stimuli, we estimated the onset latency for all presentations and then performed a Wilcoxon rank-sum test. This procedure allowed us to separate the neurons into Type 1 neurons, which fired to the P and NP stimuli with a latency that was not significantly different (Wilcoxon rank-sum test and interquartile range < 250 ms), and Type 2 neurons, which showed a significantly longer latency to the NP compared to the P stimulus.

#### Behavioral Learning Curves

We calculated the learning curves for individual picture pairs and subjects. For each paired associate, we annotated whether each response was correct or incorrect for all the trials of Task 3 (in which subjects had to identify the landmark where each person was). Subjects performed a median of 15 trials (range: 14–19), where each trial corresponds to a complete cycle through the entire set of stimuli used in the task. We estimated the trial where learning occurred by fitting the behavioral learning curves with a logistic function:

$$f(x) = \frac{1 - \gamma - \lambda}{1 + \exp(-\beta(x - \alpha))} + \gamma \quad (\text{Equation 1})$$

where  $\alpha$  corresponds to the threshold,  $\beta$  denotes the slope of the logistic function (low values of  $\beta$  correspond to gradual transitions and high values of  $\beta$  correspond to abrupt transitions), and  $\lambda, \gamma$  are two parameters related to the pre-learning lower asymptote ( $\gamma$ ) and post-learning upper asymptote

( $1 - \lambda$ ). We used a Maximum Likelihood Criterion to estimate the optimal parameters and obtained the learning time from the closest trial following  $\alpha$  (the threshold  $f(x = \alpha) = 0.5$ , for  $\lambda = \gamma = 0$ ). All subjects learned most pairs (mean: 98.3%) but the learning time varied across subjects. The learning criterion was reached on average after 2.9 trials (median 2, interquartile interval: 2).

#### Comparison of Neural and Behavioral Learning Curves

To allow a comparison with the behavioral fits, the neural data were smoothed and rescaled to a range of 0–1. For this, we rescaled the neural activity (N) to the range 0–1 ( $N_r$ ) using  $N_r = N - \min(N)/\max(N) - \min(N)$ . We then measured the similarity between neural and behavioral learning curves with a Pearson's correlation coefficient. To further quantify whether the changes in the neural activity were gradual or sudden, we fitted the neural learning curves with logistic functions with  $\beta$  as the only free parameter (Equation 1). The values of  $\lambda, \gamma$  were taken from the pre-learning and post-learning firing rates/behavioral performance, where 0/1 corresponds to pre/post-learning, respectively. The threshold  $\alpha$ , calculated for each individual pair, was kept constant. For the data aligned to absolute trial number, we considered the first 14 trials in chronological order (which corresponded to presentations during Tasks 1, 2, and 3).

#### Assessing the Quality of the Fits

We evaluated the quality of the fits following an information theoretic approach by means of the Akaike Information Criterion (Akaike, 1974). The lower the value of AIC, the more accurate the fit. To test the significance of the difference in the parameters (slope, AIC) for the neural data with different alignments, we performed a non-parametric bootstrap procedure (Kingdom and Prins, 2010).

#### SUPPLEMENTAL INFORMATION

Supplemental Information includes Supplemental Experimental Procedures, five figures, one table, and one movie and can be found with this article online at <http://dx.doi.org/10.1016/j.neuron.2015.06.016>.

#### AUTHOR CONTRIBUTIONS

M.J.I., R.Q.Q., and I.F. designed the electrophysiology study; I.F. performed the surgeries; M.J.I. collected the electrophysiological data; M.J.I. analyzed the data; M.J.I., R.Q.Q., and I.F. wrote the paper. R.Q.Q. and I.F. contributed equally to the study. All authors discussed the results and implications and commented on the manuscript at all stages.

#### ACKNOWLEDGMENTS

We are grateful to all patients for their participation and Tony Fields, Eric Behnke, Anna Postolova, Vanessa Isiaka, and Deena Pourshaban for technical assistance. We thank W. Freiwald, G. Kreiman, R. Malach, M. Moscovitch, U. Rutishauser, S. Wirth, and three anonymous reviewers for useful comments on the manuscript. This research was supported by grants from National Institute of Neurological Disorders of the National Institutes of Health under awards R56NS033221 and R01NS084017, Medical Research Council, the Human Frontiers Science Program, and the Mathers Foundation. The content is solely the responsibility of the authors and does not necessarily represent the official views of the National Institutes of Health.

Received: July 2, 2014

Revised: December 2, 2014

Accepted: June 4, 2015

Published: July 1, 2015

#### REFERENCES

- Akaike, H. (1974). A new look at the statistical model identification. *IEEE Trans. Auto. Contr.* 19, 716–723.
- Aminoff, E., Gronau, N., and Bar, M. (2007). The parahippocampal cortex mediates spatial and nonspatial associations. *Cereb. Cortex* 17, 1493–1503.

- Buffalo, E.A., Bellgowan, P.S., and Martin, A. (2006). Distinct roles for medial temporal lobe structures in memory for objects and their locations. *Learn. Mem.* *13*, 638–643.
- Bunsey, M., and Eichenbaum, H. (1996). Conservation of hippocampal memory function in rats and humans. *Nature* *379*, 255–257.
- Davachi, L. (2006). Item, context and relational episodic encoding in humans. *Curr. Opin. Neurobiol.* *16*, 693–700.
- Day, M., Langston, R., and Morris, R.G.M. (2003). Glutamate-receptor-mediated encoding and retrieval of paired-associate learning. *Nature* *424*, 205–209.
- Diana, R.A., Yonelinas, A.P., and Ranganath, C. (2007). Imaging recollection and familiarity in the medial temporal lobe: a three-component model. *Trends Cogn. Sci.* *11*, 379–386.
- Eichenbaum, H. (2004). Hippocampus: cognitive processes and neural representations that underlie declarative memory. *Neuron* *44*, 109–120.
- Eichenbaum, H., Yonelinas, A.P., and Ranganath, C. (2007). The medial temporal lobe and recognition memory. *Annu. Rev. Neurosci.* *30*, 123–152.
- Erickson, C.A., and Desimone, R. (1999). Responses of macaque perirhinal neurons during and after visual stimulus association learning. *J. Neurosci.* *19*, 10404–10416.
- Estes, W.K., Hopkins, B.L., and Crothers, E.J. (1960). All-or-none and conservative effects in the learning and retention of paired associates. *J. Exp. Psychol.* *60*, 329–339.
- Gelbard-Sagiv, H., Mukamel, R., Harel, M., Malach, R., and Fried, I. (2008). Internally generated reactivation of single neurons in human hippocampus during free recall. *Science* *322*, 96–101.
- Gochin, P.M., Colombo, M., Dorfman, G.A., Gerstein, G.L., and Gross, C.G. (1994). Neural ensemble coding in inferior temporal cortex. *J. Neurophysiol.* *71*, 2325–2337.
- Hanes, D.P., Thompson, K.G., and Schall, J.D. (1995). Relationship of presaccadic activity in frontal eye field and supplementary eye field to saccade initiation in macaque: Poisson spike train analysis. *Exp. Brain Res.* *103*, 85–96.
- Higuchi, S., and Miyashita, Y. (1996). Formation of mnemonic neuronal responses to visual paired associates in inferotemporal cortex is impaired by perirhinal and entorhinal lesions. *Proc. Natl. Acad. Sci. USA* *93*, 739–743.
- Hull, C.L. (1943). *Principles of Behavior: An Introduction to Behavior Theory* (New York: D. Appleton-Century Company).
- Ison, M.J., Mormann, F., Cerf, M., Koch, C., Fried, I., and Quiroga, R.Q. (2011). Selectivity of pyramidal cells and interneurons in the human medial temporal lobe. *J. Neurophysiol.* *106*, 1713–1721.
- Kahana, M.J., Howard, M.W., and Polyn, S.M. (2008). Associative retrieval processes in episodic memory. In *Cognitive Psychology of Memory*, H.L. Roediger III, ed. Volume 2 of *Learning and Memory: A Comprehensive Reference*, J. Byrne, ed. (Oxford: Elsevier), pp. 1–24.
- Kingdom, F.A.A., and Prins, N. (2010). *Psychophysics: A Practical Introduction* (London: Academic Press, Elsevier).
- Kirwan, C.B., and Stark, C.E. (2004). Medial temporal lobe activation during encoding and retrieval of novel face-name pairs. *Hippocampus* *14*, 919–930.
- Law, J.R., Flanery, M.A., Wirth, S., Yanike, M., Smith, A.C., Frank, L.M., Suzuki, W.A., Brown, E.N., and Stark, C.E. (2005). Functional magnetic resonance imaging activity during the gradual acquisition and expression of paired-associate memory. *J. Neurosci.* *25*, 5720–5729.
- Malkova, L., and Mishkin, M. (2003). One-trial memory for object-place associations after separate lesions of hippocampus and posterior parahippocampal region in the monkey. *J. Neurosci.* *23*, 1956–1965.
- McClelland, J.L., McNaughton, B.L., and O'Reilly, R.C. (1995). Why there are complementary learning systems in the hippocampus and neocortex: insights from the successes and failures of connectionist models of learning and memory. *Psychol. Rev.* *102*, 419–457.
- Messinger, A., Squire, L.R., Zola, S.M., and Albright, T.D. (2001). Neuronal representations of stimulus associations develop in the temporal lobe during learning. *Proc. Natl. Acad. Sci. USA* *98*, 12239–12244.
- Miller, J.F., Neufang, M., Solway, A., Brandt, A., Trippel, M., Mader, I., Hefft, S., Merkow, M., Polyn, S.M., Jacobs, J., et al. (2013). Neural activity in human hippocampal formation reveals the spatial context of retrieved memories. *Science* *342*, 1111–1114.
- Mormann, F., Kornblith, S., Quiroga, R.Q., Kraskov, A., Cerf, M., Fried, I., and Koch, C. (2008). Latency and selectivity of single neurons indicate hierarchical processing in the human medial temporal lobe. *J. Neurosci.* *28*, 8865–8872.
- Moscovitch, M. (1994). Memory and working with memory: Evaluation of a component process model and comparisons with other models. In *Memory Systems*, D.L. Schacter and E. Tulving, eds. (Cambridge: MIT Press), pp. 269–310.
- Naya, Y., Yoshida, M., and Miyashita, Y. (2001). Backward spreading of memory-retrieval signal in the primate temporal cortex. *Science* *291*, 661–664.
- Naya, Y., Yoshida, M., and Miyashita, Y. (2003). Forward processing of long-term associative memory in monkey inferotemporal cortex. *J. Neurosci.* *23*, 2861–2871.
- Pedreira, C., Mormann, F., Kraskov, A., Cerf, M., Fried, I., Koch, C., and Quiroga, R.Q. (2010). Responses of human medial temporal lobe neurons are modulated by stimulus repetition. *J. Neurophysiol.* *103*, 97–107.
- Quamme, J.R., Yonelinas, A.P., and Norman, K.A. (2007). Effect of unitization on associative recognition in amnesia. *Hippocampus* *17*, 192–200.
- Quiroga, R. (2012). Concept cells: the building blocks of declarative memory functions. *Nat. Rev. Neurosci.* *13*, 587–597.
- Quiroga, R., Nadasdy, Z., and Ben-Shaul, Y. (2004). Unsupervised spike detection and sorting with wavelets and superparamagnetic clustering. *Neural Comput.* *16*, 1661–1687.
- Quiroga, R., Reddy, L., Kreiman, G., Koch, C., and Fried, I. (2005). Invariant visual representation by single neurons in the human brain. *Nature* *435*, 1102–1107.
- Quiroga, R., Kreiman, G., Koch, C., and Fried, I. (2008). Sparse but not 'grandmother-cell' coding in the medial temporal lobe. *Trends Cogn. Sci.* *12*, 87–91.
- Quiroga, R., Kraskov, A., Koch, C., and Fried, I. (2009). Explicit encoding of multimodal percepts by single neurons in the human brain. *Curr. Biol.* *19*, 1308–1313.
- Rock, I. (1957). The role of repetition in associative learning. *Am. J. Psychol.* *70*, 186–193.
- Roediger, H.L., 3rd, and Arnold, K.M. (2012). The one-trial learning controversy and its aftermath: remembering Rock (1957). *Am. J. Psychol.* *125*, 127–143.
- Rutishauser, U., Mamelak, A.N., and Schuman, E.M. (2006). Single-trial learning of novel stimuli by individual neurons of the human hippocampus-amygdala complex. *Neuron* *49*, 805–813.
- Sakai, K., and Miyashita, Y. (1991). Neural organization for the long-term memory of paired associates. *Nature* *354*, 152–155.
- Squire, L.R., Stark, C.E.L., and Clark, R.E. (2004). The medial temporal lobe. *Annu. Rev. Neurosci.* *27*, 279–306.
- Tulving, E. (2002). Episodic memory: from mind to brain. *Annu. Rev. Psychol.* *53*, 1–25.
- Viskontas, I.V., Quiroga, R.Q., and Fried, I. (2009). Human medial temporal lobe neurons respond preferentially to personally relevant images. *Proc. Natl. Acad. Sci. USA* *106*, 21329–21334.
- Wirth, S., Yanike, M., Frank, L.M., Smith, A.C., Brown, E.N., and Suzuki, W.A. (2003). Single neurons in the monkey hippocampus and learning of new associations. *Science* *300*, 1578–1581.
- Wirth, S., Avsar, E., Chiu, C.C., Sharma, V., Smith, A.C., Brown, E., and Suzuki, W.A. (2009). Trial outcome and associative learning signals in the monkey hippocampus. *Neuron* *61*, 930–940.
- Yanike, M., Wirth, S., and Suzuki, W.A. (2004). Representation of well-learned information in the monkey hippocampus. *Neuron* *42*, 477–487.

Neuron

Supplemental Information

## **Rapid Encoding of New Memories**

**by Individual Neurons in the Human Brain**

**Matias J. Ison, Rodrigo Quian Quiroga, and Itzhak Fried**

## Supplemental Figures and Legends

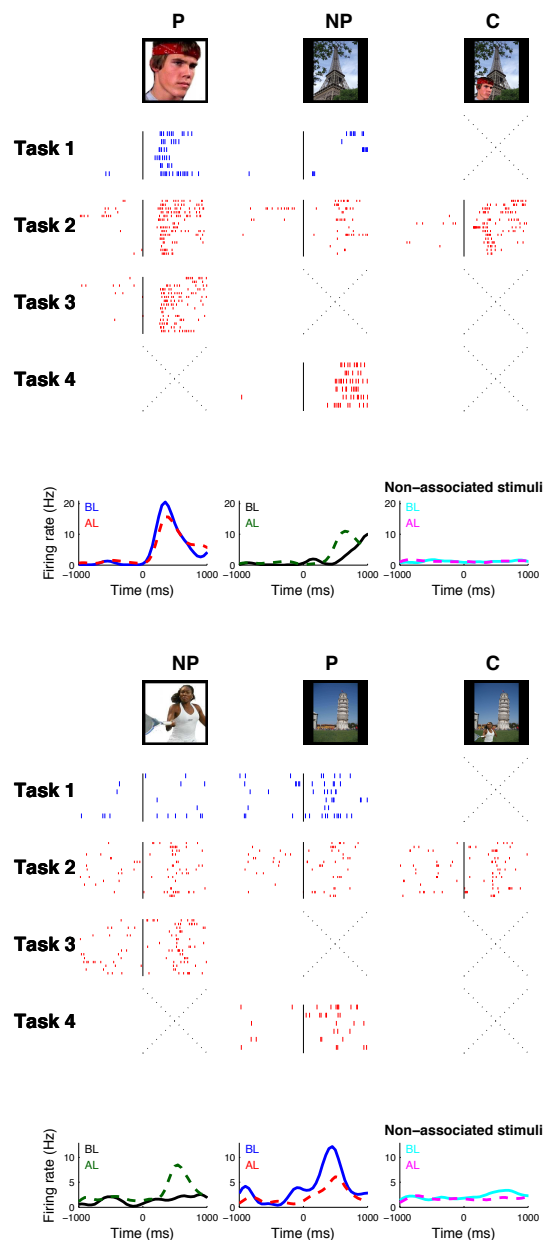

**Figure S1, Related to Figure 2. Example of single unit responses:** Conventions are the same as in Figure 2. **Top panel)** A unit in the right hippocampus initially fired to an image of the actor Josh Brolin before learning (mean=14.2 spikes/s, s.d.=6.3, median=11.7) and did not fire to the image of the Eiffel tower (mean=1.7 spikes/s, s.d.=3.3, median=0). After learning the unit fired strongly to the picture of Josh Brolin (mean: 11.4 spikes/s, left panels), to the composite picture (9.8 spikes/s, right panels) and to the picture of the Eiffel tower (6.3 spikes/s). There was a 370% increase in firing to the non-preferred stimulus. The cell did not fire to the non-preferred non-associated stimuli before learning (1.1 spikes/s, s.d.=2.8) nor it did so after learning (1.1 spikes/s, s.d.=2.4). **Bottom panel)** A cell in the left parahippocampal cortex that initially responded to the picture of the Pisa tower (mean = 8.06, s.d. = 3.9) and not to the picture of the tennis player Venus Williams (mean = 1.9, s.d. = 2.5). After learning this unit fired significantly to both images (Venus Williams: mean = 5.5, s.d. = 3.4; Pisa tower: mean = 4.3, s.d. = 3.1).

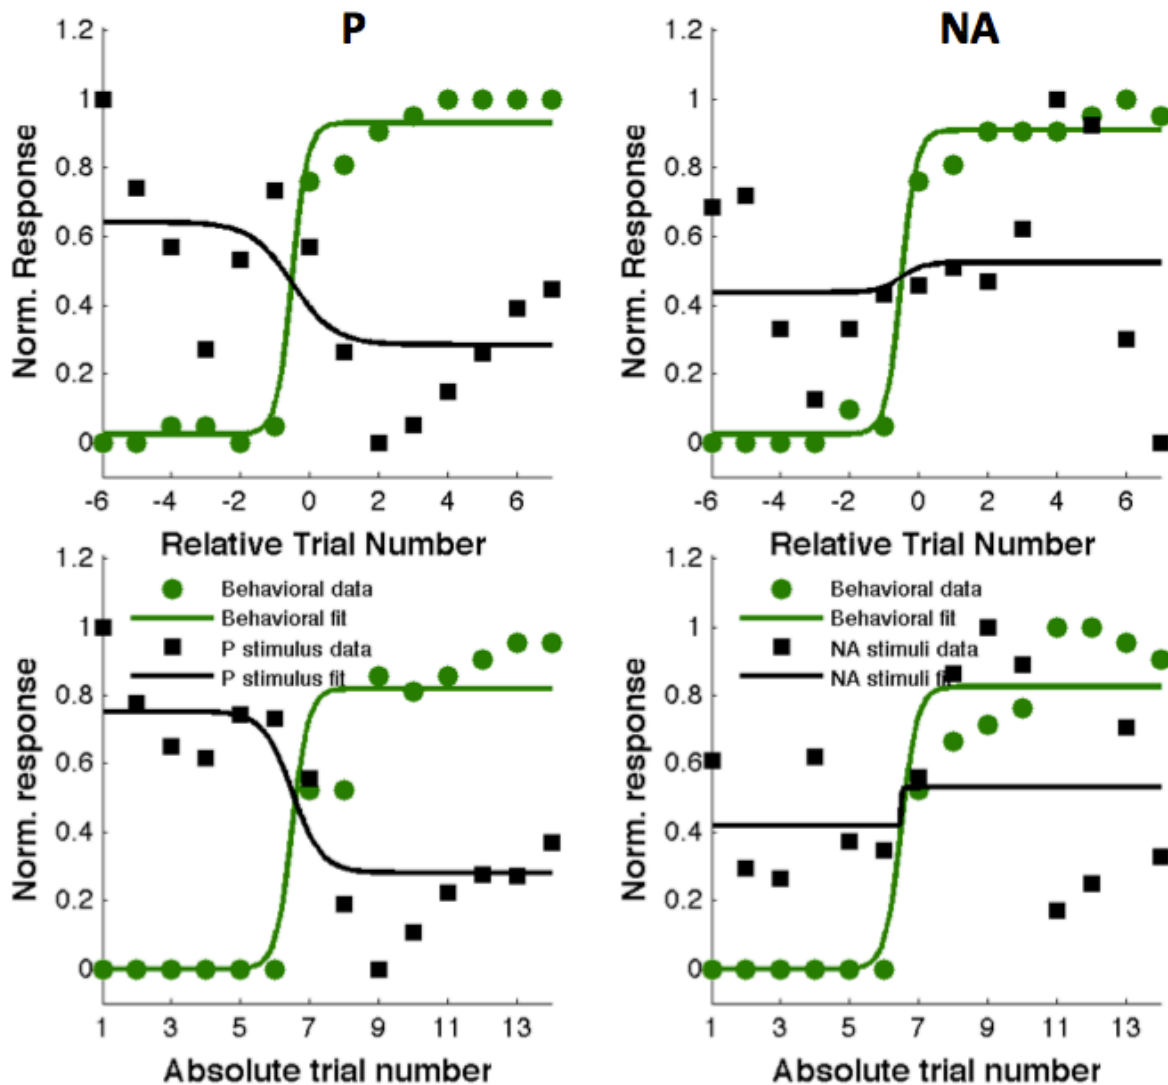

**Figure S2, Related to Figure 5D. Neural and behavioral responses to the preferred (P) and non-associated (NA) stimuli.** Average normalized neural activity (black squares) and behavioral responses (green circles) to the P stimulus (left panel) and NA stimuli (right panel) as a function of trial number. Conventions as in Figure 4D. For P, since the average response to the preferred stimuli decreased throughout the experiment, the fits were done on the reversed data (which corresponds to negative values of  $\beta$ ). Please note that neural data were rescaled to the range 0-1 to allow comparison with the behavioral responses. The figures show that the logistic model did not fit the data accurately. Pearson's coefficient  $R^2=0.46$  for P stimuli (data aligned to learning),  $R^2=0.73$  (for unaligned data); NA stimuli:  $R^2=0.03$  data aligned to learning,  $R^2=0.04$  unaligned data.

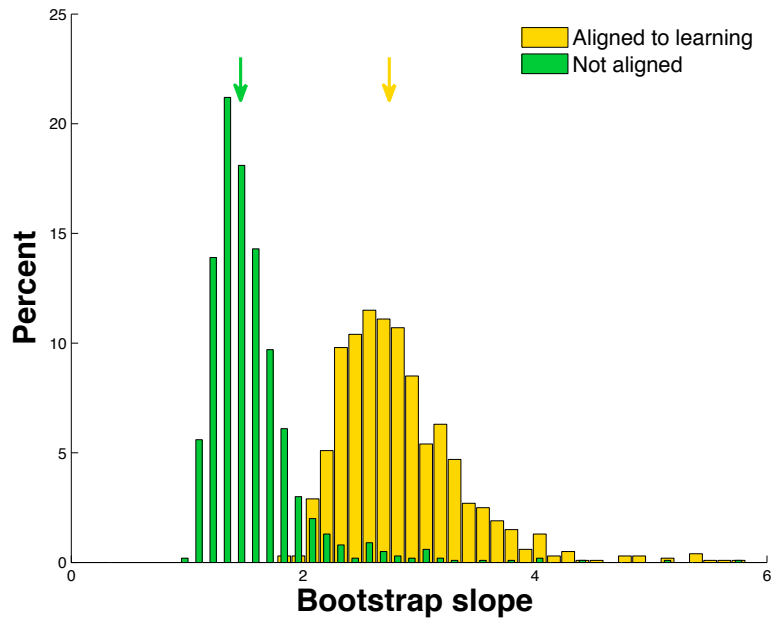

**Figure S3, Related to Figure 5D. Bootstrap analysis of the learning curves.** To test the significance of the difference in the slopes for the neural data’s learning curves with different alignments (see Figure 5D), we performed a non-parametric bootstrap procedure. We generated 1000 samples based on the observed data for each condition (data aligned to learning, not aligned). For each simulation we fit the data and obtained bootstrap slopes. The difference in the slope was obtained for each run and we estimated the p value of the difference by determining the fraction of times that the observed difference was less than 0, which was observed in 22/1000 simulations, thus yielding a p value of 0.02. The medians of the distributions are indicated with arrows.



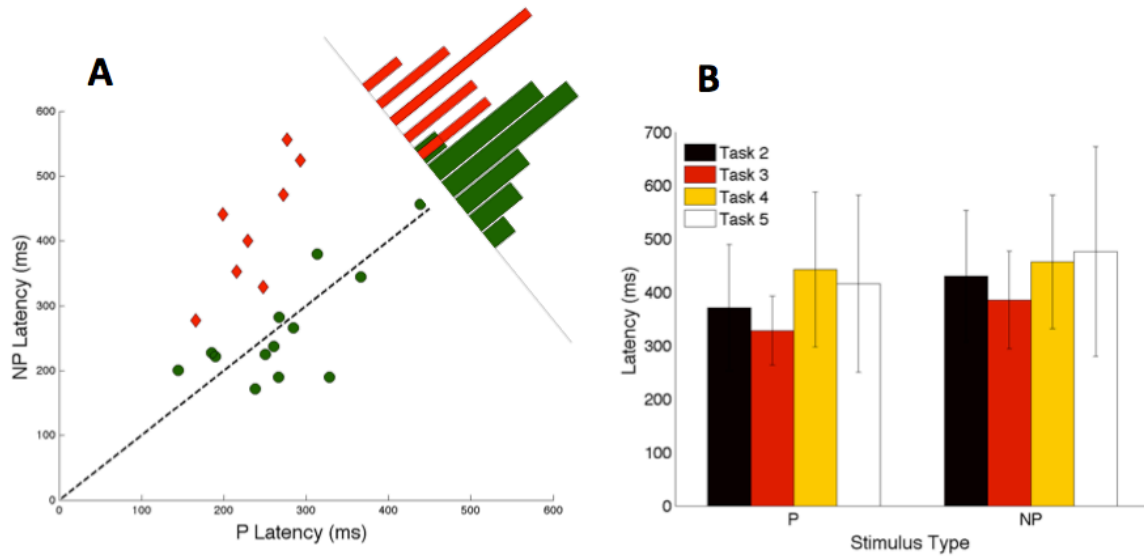

**Figure S4, Related to Figure 5A. Latency analysis.** (A) Scatter plot of the response onset latency values for the preferred and non-preferred stimuli for each neuron. Neurons were classified into Type 1 (green) and type 2 (red) according to the onset difference between the P and NP stimuli (see text for details). Type 1 neurons ( $n=13$ ) fired to the P and NP stimuli with similar latency ( $P>0.05$  Wilcoxon rank-sum test and interquartile range  $<250$  ms). Type 2 neurons ( $n=8$ ) had a significantly longer latency for the NP compared to the P stimulus ( $P<0.05$  Wilcoxon rank-sum test). The Pearson's correlation coefficient for type 1 neurons was 0.75. We projected this scatter plot onto the diagonal (equal latencies). The resulting distribution was bimodal with a median significantly different from zero ( $P=0.04$ , Wilcoxon signed-rank test). (B) Average latency for the P and NP stimuli in all tasks after learning. The latency values across the population of cells obtained from all the post learning tasks did not differ (ANOVA,  $F(3,53)=0.69/1.67$ ,  $P=0.56/0.18$  for NP/P, respectively). Error bars denote SD.

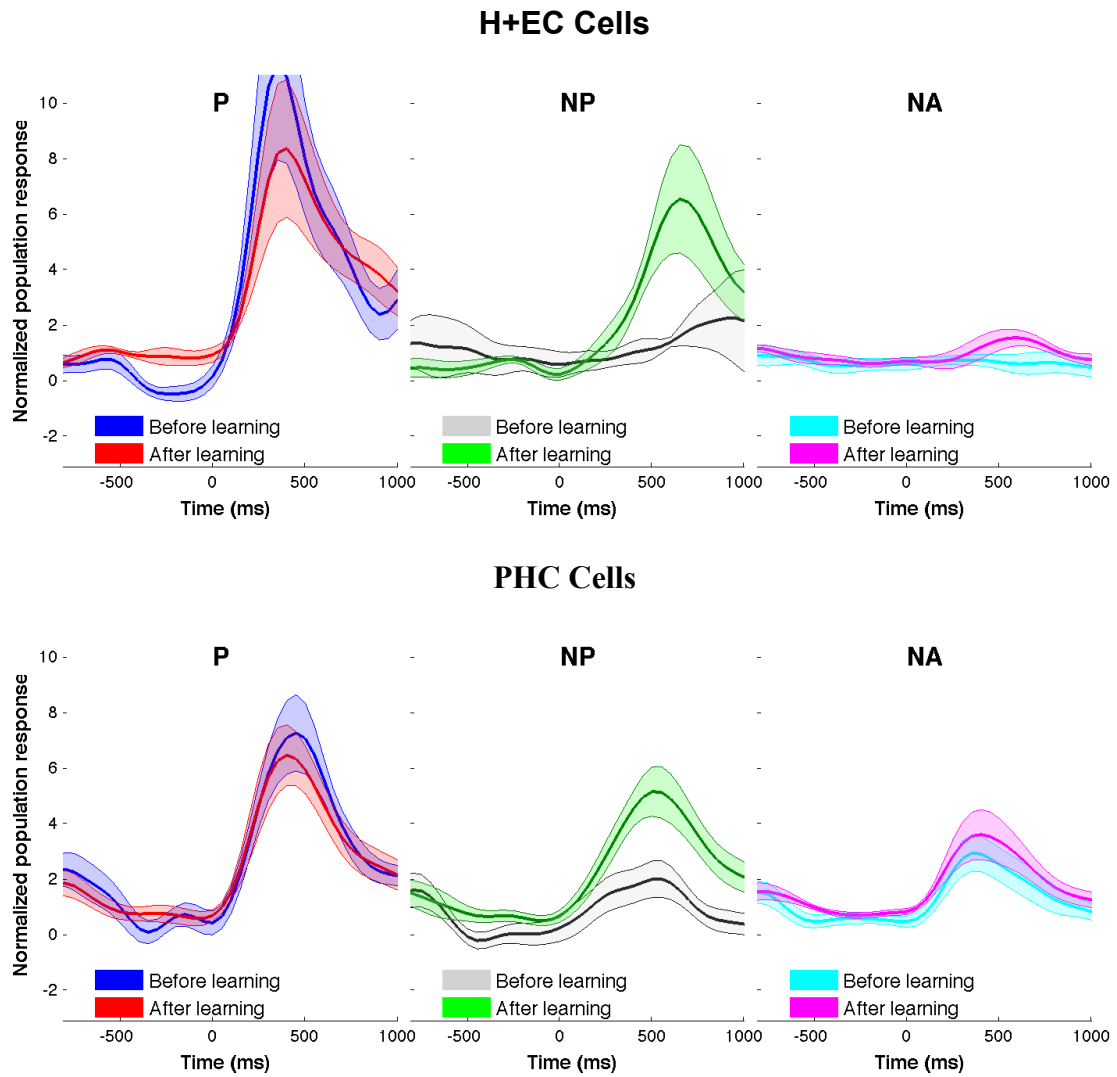

**Figure S5, Related to Figure 5A. Population response for different MTL areas.** Average normalized spike density function for pair-coding units in the Hippocampus and Entorhinal cortex (N=8) (top panel) and for pair-coding units recorded from the parahippocampal cortex (N=11). Cells recorded from both regions showed similar behavior (no significant changes in the preferred stimulus and large significant increase in the response to the non-preferred associated stimulus).

**Table S1: List of Experimental Details per patient**

| <b>Patient ID</b> | <b>Sex</b> | <b>Age</b> | <b># sessions</b> | <b># pairs</b> | <b># trials in Task 2</b> | <b># vis resp units</b> | <b># pair-coding units</b> |
|-------------------|------------|------------|-------------------|----------------|---------------------------|-------------------------|----------------------------|
| 1                 | F          | 37         | 2                 | (7,8)          | (15,15)                   | 8                       | 6                          |
| 2                 | M          | 37         | 2                 | (7,7)          | (15,15)                   | 9                       | 2                          |
| 3                 | F          | 22         | 2                 | (8,8)          | (14,14)                   | 6                       | 3                          |
| 4                 | F          | 45         | 2                 | (8,8)          | (14,14)                   | 2                       | 1                          |
| 5                 | M          | 34         | 2                 | (3,3)          | (14,14)                   | 3                       | 0                          |
| 6                 | M          | 40         | 1                 | 7              | 14                        | 1                       | 1                          |
| 7                 | F          | 52         | 1                 | 7              | 16                        | 0                       | 0                          |
| 8                 | F          | 19         | 3                 | (8,8,8)        | (15,15,19)                | 9                       | 4                          |
| 9                 | F          | 53         | 2                 | (7,5)          | (15,15)                   | 2                       | 0                          |
| 10                | M          | 27         | 1                 | 8              | 15                        | 2                       | 1                          |
| 11                | F          | 18         | 1                 | 4              | 15                        | 0                       | 0                          |
| 12                | M          | 45         | 2                 | (6,6)          | (15,15)                   | 2                       | 1                          |
| 13                | M          | 29         | 2                 | (3,3)          | (15,15)                   | 6                       | 1                          |
| 14                | F          | 50         | 2                 | (7,7)          | (15,15)                   | 1                       | 1                          |
| <b>N=14</b>       | <b>8F</b>  | <b>37*</b> | <b>2*</b>         | <b>7*</b>      | <b>15*</b>                | <b>N=51</b>             | <b>N=21</b>                |

# pairs: (x,y): Number of pairs used in each session.

\*denotes median value over row

## Supplemental Movie

# Rapid encoding of new memories by individual neurons in the human brain

Matias J. Ison, Rodrigo Quian Quiroga & Itzhak Fried

**Movie S1, Related to Figure 3. An example of a single neuron firing during learning of new associations.** The movie has three parts. The first part shows a unit that fires preferentially to a picture of the White House before the associated pairs are presented. Due to time constraints, responses to only some of the stimuli are presented. Part two shows the response of the same neuron when associations are created. The picture of the White House (preferred stimulus) is associated to the picture of the beach volleyball player Kerri Walsh (non-preferred stimulus). The video shows how the cell becomes responsive to the picture of Kerri Walsh after learning. Part three shows a summary of the results for the exemplary unit and also for the population of cells.

MPEG animation (.mp4) 6.5 MB

### Supplemental Experimental Procedures

**Subjects.** 14 patients with pharmacologically intractable epilepsy (10 right handed, 6 male, 18 to 53 years old) participated in this study. Before starting the sessions, subjects were explained the different experimental tasks, including that they would see pictures of people appearing at different places and they would be asked to recall these associations later. The study conformed to the guidelines of the Medical Institutional Review Board at UCLA.

**Electrophysiology.** Electrodes contained nine platinum-iridium microwires ( $40 \mu\text{m}$ ) protruding  $\sim 4$  mm into the tissue beyond the tip of the electrode. Eight of the microwires acted as the active recording electrodes (impedance =  $\sim 200\text{-}500 \text{ k}\Omega$ ) and the ninth microwire was blunted and acted as a low-impedance ( $\sim 2\text{-}5 \Omega$ ) reference. The differential signal from the microwires was amplified and filtered between 1 and 9000 Hz. Data from 6 patients were recorded with a 64-channel Neuralynx system (Bozeman, MT) with a sampling rate of 28 kHz. In the remaining 8 patients, data were acquired at 30 kHz using a 128-channel acquisition system (Blackrock Microsystems, Salt Lake City, UT). The extracellular signals were bandpass filtered (300 Hz to 3 kHz) and later analyzed offline. Spikes were detected and sorted using wave\_clus (Quian Quiroga et al., 2004).

**Experimental sessions.** All paradigms were implemented in MATLAB (Mathworks, Natick, MA) using the psychophysics toolbox (Brainard, 1997). Subjects sat in bed facing a laptop computer on which pictures were presented. In the screening session, they were instructed to respond whether the image showed a person or not with a button press. A median of 105 pictures (interquartile range: 96-114) were displayed six times in pseudorandom order (Ison et al., 2011; Quian Quiroga et al., 2005). Each image was shown for 1 second. After each screening session, we selected a subset of the stimuli (mean: 14, range: 6-16) to create the images to be shown in the “association sessions”. The number of association pairs were decided ad hoc based on the overall performance of the subjects in the screening sessions and in previous association sessions (were more than one association session was performed in the same subject). The rationale for deciding the number of association pairs in each case was to tune the level of difficulty of the task (trying to make it challenging but not way too difficult for the subject) and the total time required to do the experiment based on the response times of the subject (trying not to go over about 30'). Each image was shown for 1 second and the mean interstimulus interval was 1,910ms (SD=320). Data come from 25 experimental sessions in 14 patients. 3 experimental sessions were completed for tasks 1-4 and 22 for tasks 1-5. Data from 4 additional patients (6 sessions) were excluded due to sessions being interrupted (N=1), lack of well isolated units (N=4) or lack of behavioral learning (N=1).

**Data analysis: Neural data.** All analyses were performed using custom programs written in MATLAB (Mathworks, Natick, MA).

**Proportion of pair-coding units:** To test whether the number of observed pair-coding neurons exceeded the one expected by chance we used a binomial test (Fried et al., 2011; Wang et al., 2014). Let  $N_s$  indicate the total number of visually responsive units and  $N_r$  indicate the number of units that showed a significant change in the response after learning (pair-coding units). Considering the probability of observing the effect in one cell at a chance level of 0.05, the probability of observing  $N_r$  or more pair-coding units under the null hypothesis can be calculated with a binomial test. As an alternative scenario, we compared the p-values obtained experimentally against those expected assuming the null hypothesis of a Poisson process (Fried et al., 2011). For each unit we created a simulated spike train with the same firing rate but with the spike times governed by a homogeneous Poisson process. We generated 1,000 simulations, used the same methods and criteria applied to the real data, and found that the simulated p-values were lower than the ones observed in real data in less than 0.4% of the cases.

**Proportion of persons preferred units:** To test for equality of proportions of units firing preferentially to pictures of persons rather than landmarks in different brain regions we used a chi-squared test, taken together units recorded in the hippocampus-entorhinal cortex against units recorded from the parahippocampal cortex.

**Changes in NP stimulus against other stimuli:** To assess statistical significance of the increase in the NP responses with learning against the ones to any other stimuli across the population of visually responsive units we used a permutation test. We took the smallest difference in the increase in the mean NP response against all the rest of the stimuli and shuffled the labels of the stimuli. We ran 5,000 permutations and determined the p-value as the fraction of permutations which showed a smallest difference larger than the original test statistic. We observed that this happened 61/5000 times, which gives  $P=0.012$ .

**Decoding analysis:** We used a linear classifier (Fisher's linear discriminant) to decode the identity of the stimuli before and after learning. We took the number of spikes in the response interval as a classifying feature and used a leave-one-out cross-validation, testing for all the pair-coding cells in the before learning and after learning trials. To assess the statistical significance of the decoding performance (relative to the chance level of 0.5) we used permutation tests by randomly rearranging all the labels of the observed data points to obtain the null hypothesis. We used 1,000 permutations and rejected the null hypothesis if the performance of the permuted data was larger than the one observed for more than 5% of the cases.

**Latency estimation:** Onset latencies for responsive units were determined by Poisson spike train analysis (Hanes et al., 1995; Mormann et al., 2008). For each stimulus, we determined the time between stimulus onset and the onset of the first spike train in all presentations. The median across all presentations was taken as response latency. As in previous studies (Mormann et al., 2008), in cases where the baseline firing rate was <2 Hz or the Poisson method failed to find consistent responses (responses for which less than half the trials closest to the median were >200 ms apart), the median of the first spike during the interval [100 ms 800 ms] was used instead. To compare the latency values for the P and NP stimuli we estimated the onset latency for all presentations and then performed a Wilcoxon rank-sum test. This procedure allowed us to separate the neurons into Type 1 neurons, which fired to the P and NP stimuli with a similar latency ( $P > 0.05$  Wilcoxon rank-sum test and interquartile range <250 ms), and Type 2 neurons, that showed a significantly longer latency to the NP compared to the P stimulus.

**Assessing the quality of the fits:** We evaluated the quality of the fits following an information theoretic approach by means of the Akaike Information Criterion (Akaike, 1974). The AIC can be obtained from the likelihood of the data ( $L$ ) as  $AIC = -2\ln(L) + 2k$ , where  $k$  represents the number of free parameters in the model. The lower the value of AIC the more accurate the fit. The analysis of the psychometric function was performed using the Palamedes toolbox for MATLAB (Kingdom and Prins, 2010). To test the significance of the difference in the parameters (slope, AIC) for the neural data with different alignments we performed a non-parametric bootstrap procedure (Kingdom and Prins, 2010). We generated 1000 samples based on the observed data for each condition (data aligned to learning, not aligned). For each simulation we fit the data and obtained bootstrap slopes. The difference in the slope was obtained for each run and we estimated the p value of the difference by determining the fraction of times that the observed difference was less than 0.

**Stability of multi-units:** To quantify the stability of the spike multi-units waveforms we separated the spikes fired during the first five minutes of the recording from the ones that were fired during the last five minutes. To evaluate the similarity of different spike shapes we calculated Pearson's correlation coefficient between the two averages of the waveforms, so that a value of 1 would indicate identical spike shapes (Jackson and Fetz, 2007). Similarities were calculated between pair-coding multi-units during the first/last five minutes of the recording and also between all pairs of different multi-units. The similarity between the same multi-units showed a median of 0.9992) and differed significantly ( $P < 10^{-4}$ , Wilcoxon rank-sum test) from the similarity between different multi-units, which showed a median of 0.9474. For the ISIs, we calculated the mean ISI during the first and last five minutes of the recording for each multi-unit. Although differences in the ISI distribution could arise as a result of changes in unit composition and also as a result of the change in the firing pattern after learning, we found no significant differences between the ISIs during the first and last five minutes ( $P = 0.89$ , Wilcoxon rank-sum test). Altogether, this shows that

the units that we recorded from did not change their properties over the timescale of the experiment.

### Supplemental References

- Akaike, H. (1974). A new look at the statistical model identification. *Automatic Control, IEEE Transactions on* 19, 716-723.
- Brainard, D.H. (1997). The psychophysics toolbox. *Spatial Vision* 10, 433-436.
- Fried, I., Mukamel, R., and Kreiman, G. (2011). Internally generated preactivation of single neurons in human medial frontal cortex predicts volition. *Neuron* 69, 548-562.
- Hanes, D.P., Thompson, K.G., and Schall, J.D. (1995). Relationship of presaccadic activity in frontal eye field and supplementary eye field to saccade initiation in macaque: Poisson spike train analysis. *Exp Brain Res* 103, 85-96.
- Ison, M.J., Mormann, F., Cerf, M., Koch, C., Fried, I., and Quiroga, R.Q. (2011). Selectivity of pyramidal cells and interneurons in the human medial temporal lobe. *J Neurophysiol* 106, 1713-1721.
- Jackson, A., and Fetz, E.E. (2007). Compact movable microwire array for long-term chronic unit recording in cerebral cortex of primates. *Journal of Neurophysiology* 98, 3109-3118.
- Kingdom, F.A.A., and Prins, N. (2010). *Psychophysics: A Practical Introduction* (London: Academic Press, Elsevier).
- Mormann, F., Kornblith, S., Quiroga, R.Q., Kraskov, A., Cerf, M., Fried, I., and Koch, C. (2008). Latency and selectivity of single neurons indicate hierarchical processing in the human medial temporal lobe. *J Neurosci* 28, 8865-8872.
- Quiroga, R., Nadasdy, Z., and Ben-Shaul, Y. (2004). Unsupervised spike detection and sorting with wavelets and superparamagnetic clustering. *Neural Comput* 16, 1661-1687.
- Quiroga, R., Reddy, L., Kreiman, G., Koch, C., and Fried, I. (2005). Invariant visual representation by single neurons in the human brain. *Nature* 435, 1102-1107.
- Wang, S., Tudusciuc, O., Mamelak, A.N., Ross, I.B., Adolphs, R., and Rutishauser, U. (2014). Neurons in the human amygdala selective for perceived emotion. *Proc Natl Acad Sci U S A* 111, E3110-3119.
